# Supplementary material
Source: HighWire-hosted journal article supplement (https://svn.smart01.highwire.org/content/svn-2023-002357)
Supplement: inline-supplementary-material-1 [file inline-supplementary-material-1.pdf]

Supplementary Table 1: Antithrombotic use prior to admission in the early and late anticoagulation groups

| Antithrombotic agent | ≥4 days (101) | <4 days (107) |
|----------------------|---------------|---------------|
| Aspirin              | 39            | 30            |
| Clopidogrel          | 8             | 11            |
| Dipyridamole         | 0             | 4             |
| Warfarin             | 5             | 8             |
| Dabigatran           | 3             | 3             |
| Apixaban             | 2             | 3             |
| Rivaroxaban          | 2             | 9             |
